# Supplementary material for: How aerosols and greenhouse gases influence the diurnal temperature range
Source: Copernicus journal article supplement (doi:10.5194/acp-2020-192), 2020-05-04
Supplement: Supplementary file 1 [file acp-2020-192-supplement.pdf]

## SUPPLEMENTARY MATERIAL

# How aerosols and greenhouse gases influence the diurnal temperature range

Camilla W. Stjern<sup>1</sup>, Bjørn H. Samset<sup>1</sup>, Olivier Boucher<sup>2</sup>, Trond Iversen<sup>3</sup>, Jean-François Lamarque<sup>4</sup>, Gunnar Myhre<sup>1</sup>, Drew Shindell<sup>5</sup>, Toshihiko Takemura<sup>6</sup>

<sup>1</sup>CICERO Center of International Climate Research, Oslo, Norway

<sup>2</sup> Institut Pierre-Simon Laplace, Sorbonne Université / CNRS, Paris, France

<sup>3</sup> Norwegian Meteorological Institute, Oslo, Norway

<sup>4</sup> NCAR/UCAR, Boulder, USA

<sup>5</sup> Nicholas School of the Environment, Duke University, Durham, NC, USA

<sup>6</sup> Kyushu University, Fukuoka, Japan

Corresponding author: Camilla W. Stjern, [camilla.stjern@cicero.oslo.no](mailto:camilla.stjern@cicero.oslo.no)

Tables S1 – S8

Figure S1 – S5

**Table S1:** Multi-model median correlations (i.e., the median of the 9 individual model correlation coefficients) between changes in DTR and a selection of variables, for the global land region. Correlations are based on 50 yearly (the last 50 years of the 100-year simulations) values of seasonal, regional mean changes. The table only includes coefficients for relationships that were statistically significant ( $p < 0.05$  by the Student's t-test) for at least 75 % of the models. Note that we also calculated correlations to surface evaporation, but as correlation coefficients were nearly identical to that of latent heat, it is not included here.

|              |            | Cloud cover | Latent heat | Sensible heat | Clear-sky downwelling SW radiation | All-sky downwelling SW radiation | All-sky downwelling LW radiation |
|--------------|------------|-------------|-------------|---------------|------------------------------------|----------------------------------|----------------------------------|
| <b>CO2x2</b> | <b>DJF</b> | -0.57       | -0.39       |               |                                    | +0.58                            | -0.33                            |
|              | <b>JJA</b> | -0.60       | -0.49       | +0.58         |                                    | +0.60                            |                                  |
| <b>BCx10</b> | <b>DJF</b> | -0.52       | -0.27       |               |                                    | +0.67                            | -0.35                            |
|              | <b>JJA</b> | -0.62       | -0.46       | +0.64         |                                    | +0.64                            |                                  |
| <b>SO4x5</b> | <b>DJF</b> | -0.50       | -0.29       |               | +0.42                              | +0.61                            | -0.42                            |
|              | <b>JJA</b> | -0.67       | -0.55       | +0.68         |                                    | +0.71                            |                                  |

**Table S2:** Like Table S1, for the USA region.

|              |            | Cloud cover | Latent heat | Sensible heat | Clear-sky downwelling SW radiation | All-sky downwelling SW radiation | All-sky downwelling LW radiation |
|--------------|------------|-------------|-------------|---------------|------------------------------------|----------------------------------|----------------------------------|
| <b>CO2x2</b> | <b>DJF</b> | -0.64       | -0.30       |               |                                    | +0.51                            |                                  |
|              | <b>JJA</b> | -0.74       | -0.76       | <b>+0.84</b>  |                                    | <b>+0.83</b>                     |                                  |
| <b>BCx10</b> | <b>DJF</b> | -0.67       | -0.24       |               |                                    | +0.63                            | -0.30                            |
|              | <b>JJA</b> | -0.74       | -0.74       | <b>+0.88</b>  |                                    | <b>+0.86</b>                     |                                  |
| <b>SO4x5</b> | <b>DJF</b> | -0.56       |             |               |                                    | +0.58                            |                                  |
|              | <b>JJA</b> | -0.78       | -0.66       | <b>+0.85</b>  | +0.40                              | +0.80                            |                                  |

**Table S3:** Like Table S1, for the Europe region. Regionally averaged, DTR goes down in DJF for all drivers, consistently due to a stronger increase in  $T_{\min}$  than in  $T_{\max}$ . In JJA, DTR increases, due to a much stronger increase in  $T_{\max}$  than in  $T_{\min}$ . Cloud amounts go down in DJF and up in JJA.

|              |            | Cloud cover | Latent heat | Sensible heat | Clear-sky downwelling SW radiation | All-sky downwelling SW radiation | All-sky downwelling LW radiation |
|--------------|------------|-------------|-------------|---------------|------------------------------------|----------------------------------|----------------------------------|
| <b>CO2x2</b> | <b>DJF</b> | -0.51       |             |               |                                    | +0.50                            | -0.50                            |
|              | <b>JJA</b> | -0.77       | -0.58       | <b>+0.84</b>  |                                    | <b>+0.80</b>                     |                                  |
| <b>BCx10</b> | <b>DJF</b> | -0.53       |             |               | +0.48                              | +0.57                            | -0.53                            |
|              | <b>JJA</b> | -0.70       | -0.57       | +0.77         |                                    | +0.77                            |                                  |
| <b>SO4x5</b> | <b>DJF</b> | -0.38       |             |               | +0.55                              | +0.51                            | -0.61                            |
|              | <b>JJA</b> | -0.70       |             | <b>+0.84</b>  | +0.37                              | <b>+0.83</b>                     |                                  |

**Table S4:** Like Table S1, for the India region.

|              |            | Cloud cover  | Latent heat | Sensible heat | Clear-sky downwelling SW radiation | All-sky downwelling SW radiation | All-sky downwelling LW radiation |
|--------------|------------|--------------|-------------|---------------|------------------------------------|----------------------------------|----------------------------------|
| <b>CO2x2</b> | <b>DJF</b> | -0.61        | -0.54       | +0.67         | +0.68                              | <b>+0.82</b>                     | -0.66                            |
|              | <b>JJA</b> | <b>-0.85</b> | -0.70       | <b>+0.87</b>  | +0.59                              | <b>+0.85</b>                     | -0.28                            |
| <b>BCx10</b> | <b>DJF</b> | -0.67        | -0.66       | +0.64         | +0.56                              | +0.70                            | -0.67                            |
|              | <b>JJA</b> | <b>-0.84</b> | -0.65       | <b>+0.84</b>  | +0.71                              | <b>+0.90</b>                     | -0.30                            |
| <b>SO4x5</b> | <b>DJF</b> | -0.67        | -0.64       | +0.75         | +0.64                              | <b>+0.81</b>                     | -0.58                            |
|              | <b>JJA</b> | <b>-0.83</b> | -0.78       | <b>+0.87</b>  | +0.76                              | <b>+0.89</b>                     | -0.63                            |

**Table S5:** Like Table S1, for the China region.

|              |            | Cloud cover | Latent heat | Sensible heat | Clear-sky downwelling SW radiation | All-sky downwelling SW radiation | All-sky downwelling LW radiation |
|--------------|------------|-------------|-------------|---------------|------------------------------------|----------------------------------|----------------------------------|
| <b>CO2x2</b> | <b>DJF</b> | -0.78       |             | +0.43         | +0.53                              | <b>+0.87</b>                     | -0.39                            |
|              | <b>JJA</b> | -0.75       |             | +0.77         |                                    | <b>+0.85</b>                     |                                  |
| <b>BCx10</b> | <b>DJF</b> | -0.73       |             | +0.31         | +0.32                              | +0.75                            |                                  |
|              | <b>JJA</b> | -0.78       |             | +0.70         |                                    | <b>+0.86</b>                     |                                  |
| <b>SO4x5</b> | <b>DJF</b> | -0.67       |             |               |                                    | +0.79                            |                                  |
|              | <b>JJA</b> | -0.75       |             | +0.77         | +0.64                              | <b>+0.81</b>                     | -0.41                            |

**Table S6:** Like Table S1, for the Arctic region, where DTR goes down for all drivers in DJF, while JJA responses are more varying (increasing DTR for CO<sub>2</sub>, due to strong increase in T<sub>max</sub>, but reducing for BC and SO<sub>4</sub> due to stronger increase in T<sub>min</sub>).

|              |            | Cloud cover | Latent heat | Sensible heat | Clear-sky downwelling SW radiation | All-sky downwelling SW radiation | All-sky downwelling LW radiation |
|--------------|------------|-------------|-------------|---------------|------------------------------------|----------------------------------|----------------------------------|
| <b>CO2x2</b> | <b>DJF</b> |             |             | -0.39         |                                    |                                  |                                  |
|              | <b>JJA</b> | -0.73       | +0.52       | +0.60         |                                    | +0.77                            |                                  |
| <b>BCx10</b> | <b>DJF</b> |             |             | -0.38         |                                    |                                  |                                  |
|              | <b>JJA</b> | -0.76       |             | +0.59         |                                    | +0.72                            |                                  |
| <b>SO4x5</b> | <b>DJF</b> |             |             |               |                                    |                                  |                                  |
|              | <b>JJA</b> | -0.77       |             | +0.58         |                                    | +0.70                            |                                  |

**Table S7:** Multi-model median cloud cover changes, normalized by global mean temperature change [% per K].

|            | <b>CO2x2</b> |            | <b>BCx10</b> |            | <b>SO4x5</b> |            |
|------------|--------------|------------|--------------|------------|--------------|------------|
|            | <b>DJF</b>   | <b>JJA</b> | <b>DJF</b>   | <b>JJA</b> | <b>DJF</b>   | <b>JJA</b> |
| <b>LND</b> | +0.10        | -0.35      | -0.20        | -1.13      | +0.04        | -0.41      |
| <b>USA</b> | +0.15        | -0.12      | +0.44        | -3.10      | -0.26        | -1.04      |
| <b>EUR</b> | +0.10        | -0.75      | -0.85        | -6.60      | +0.45        | -1.18      |
| <b>IND</b> | -0.09        | -0.0       | -0.24        | +5.65      | -0.56        | +2.16      |
| <b>CHI</b> | +0.03        | -0.29      | +1.45        | +0.71      | -0.17        | +0.15      |
| <b>ARC</b> | +1.04        | -0.51      | +1.27        | +0.71      | +0.88        | +0.55      |

**Table S8:** Multi-model median changes in downwelling clear-sky SW radiation at the surface, normalized by global mean temperature change [W/m<sup>2</sup> per K].

|            | CO2x2 |       | BCx10  |        | SO4x5 |       |
|------------|-------|-------|--------|--------|-------|-------|
|            | DJF   | JJA   | DJF    | JJA    | DJF   | JJA   |
| <b>LND</b> | -0.97 | -1.05 | -13.64 | -20.63 | +1.34 | +2.96 |
| <b>USA</b> | -1.18 | -0.93 | -10.15 | -20.60 | +1.82 | +5.40 |
| <b>EUR</b> | -0.79 | -0.74 | -10.88 | -33.71 | +1.90 | +8.34 |
| <b>IND</b> | -1.21 | -1.49 | -53.65 | -43.68 | +3.21 | +4.92 |
| <b>CHI</b> | -1.33 | -1.16 | -46.07 | -49.48 | +3.50 | +9.23 |
| <b>ARC</b> | -0.34 | -1.21 | -2.20  | -11.50 | +0.27 | +0.47 |

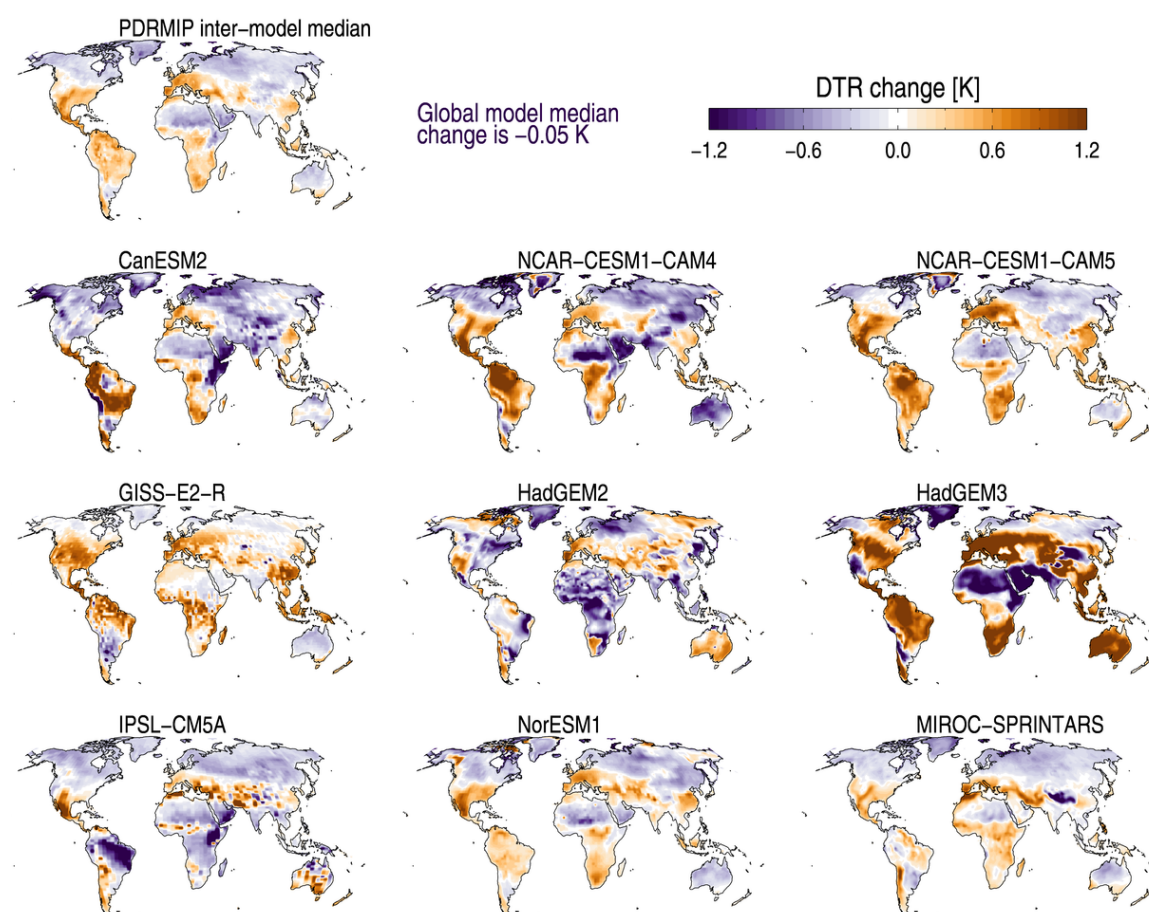

**Figure S1:** Annual mean DTR change (not normalized by global mean temperature change as in the main manuscript) for the CO2x2 experiment for all nine models.

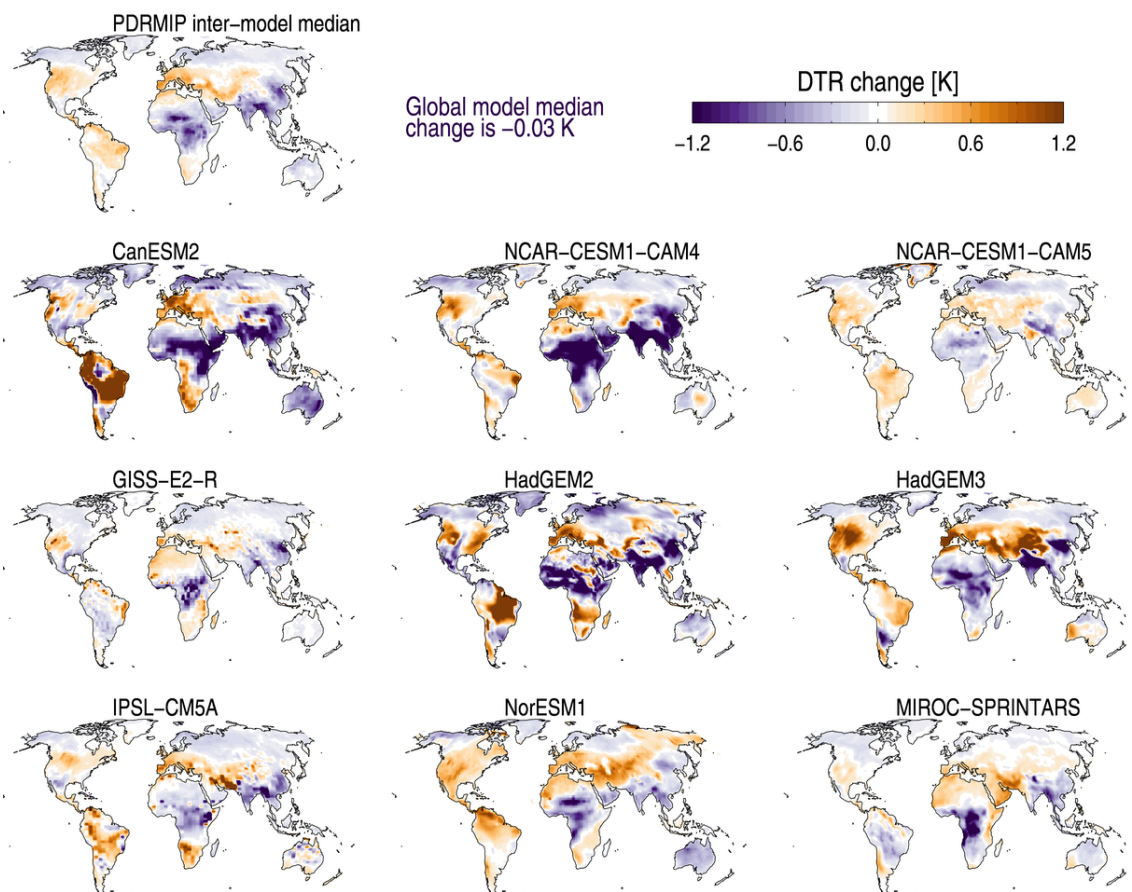

**Figure S2:** Annual mean DTR change (not normalized by the global mean temperature change as in the main manuscript) for the BCx10 experiment for all nine models.

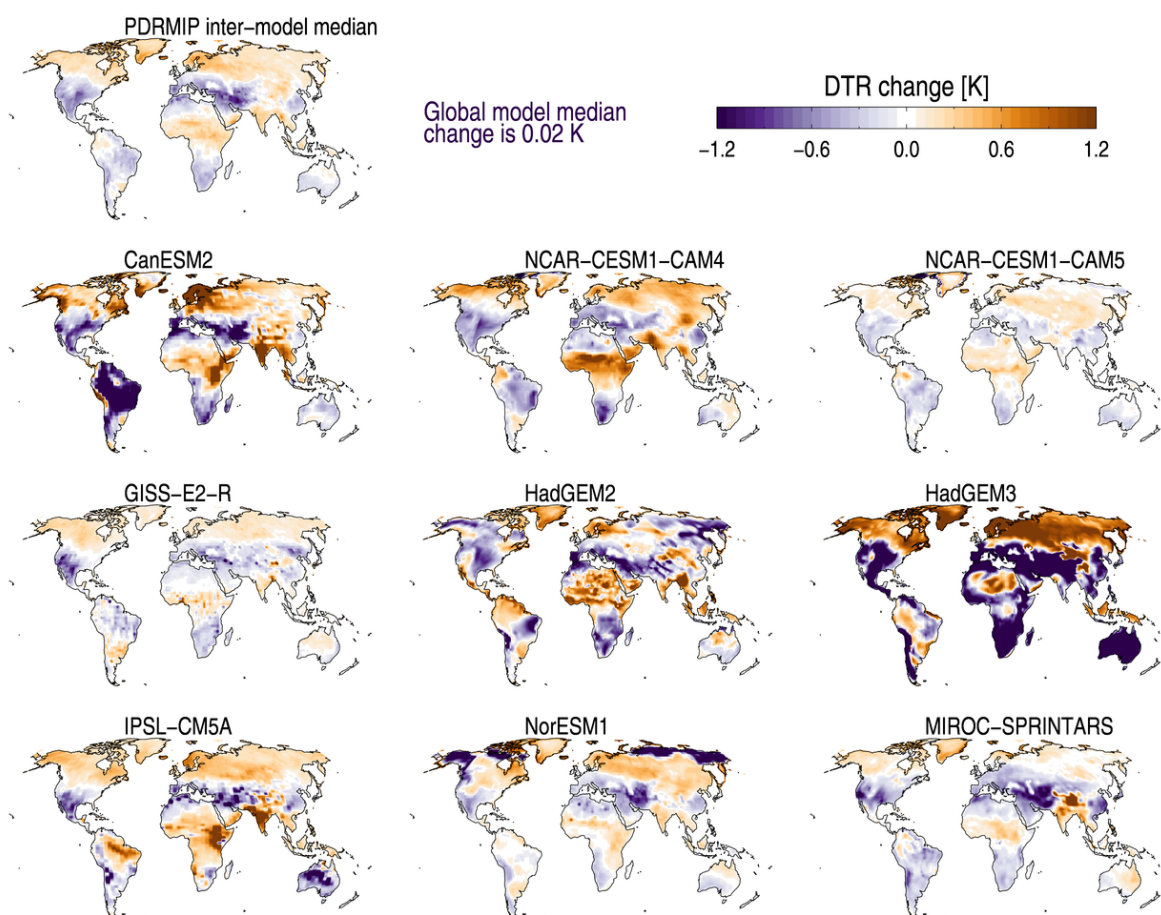

**Figure S3:** Annual mean DTR change (not normalized by the global mean temperature change as in the main manuscript) for the SO<sub>4</sub>x5 experiment for all nine models. Note that as SO<sub>4</sub> cools the climate, normalization by the global mean temperature change turns the sign of the DTR change expected from an increase in SO<sub>4</sub>. An increase in SO<sub>4</sub> causes, e.g., reduced DTR over China and increased DTR over India, as seen in the maps above, but opposite to the signals seen in the maps of the main manuscript.

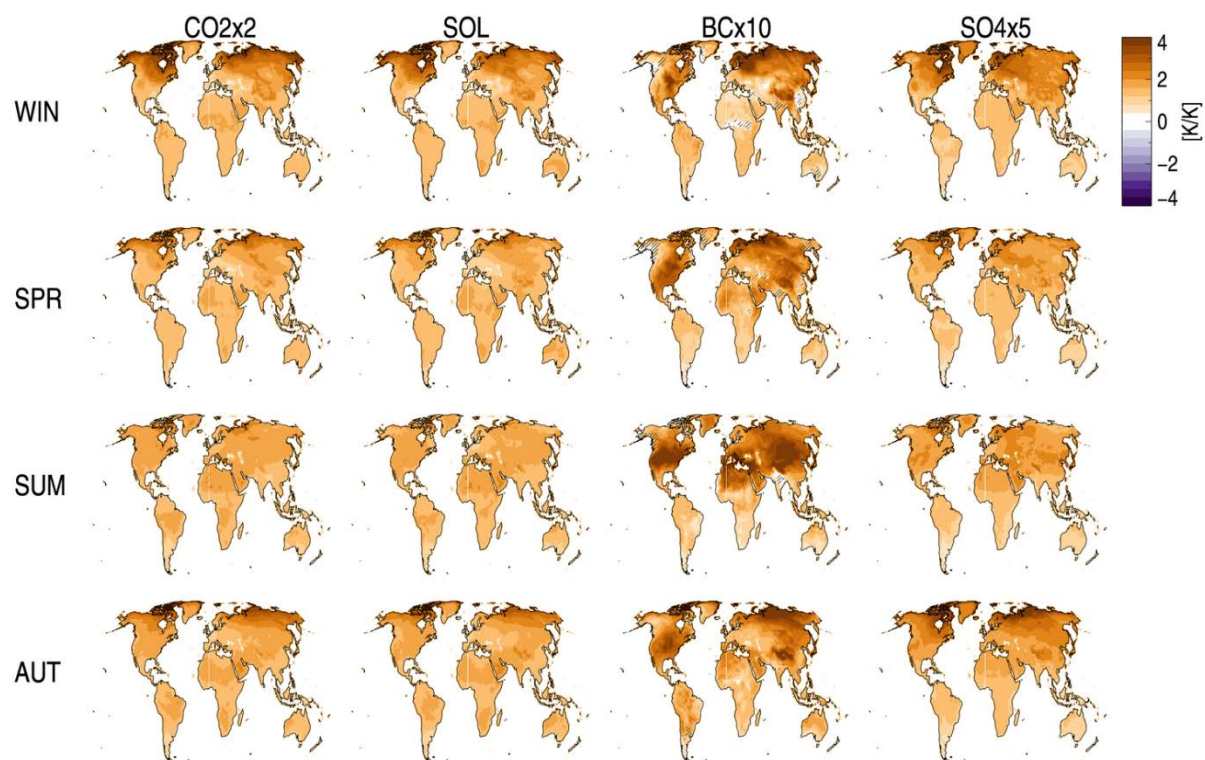

**Figure S4:** Multi-model median change in Tmin for the different seasons and drivers, normalized by the global mean temperature change for each model and driver.



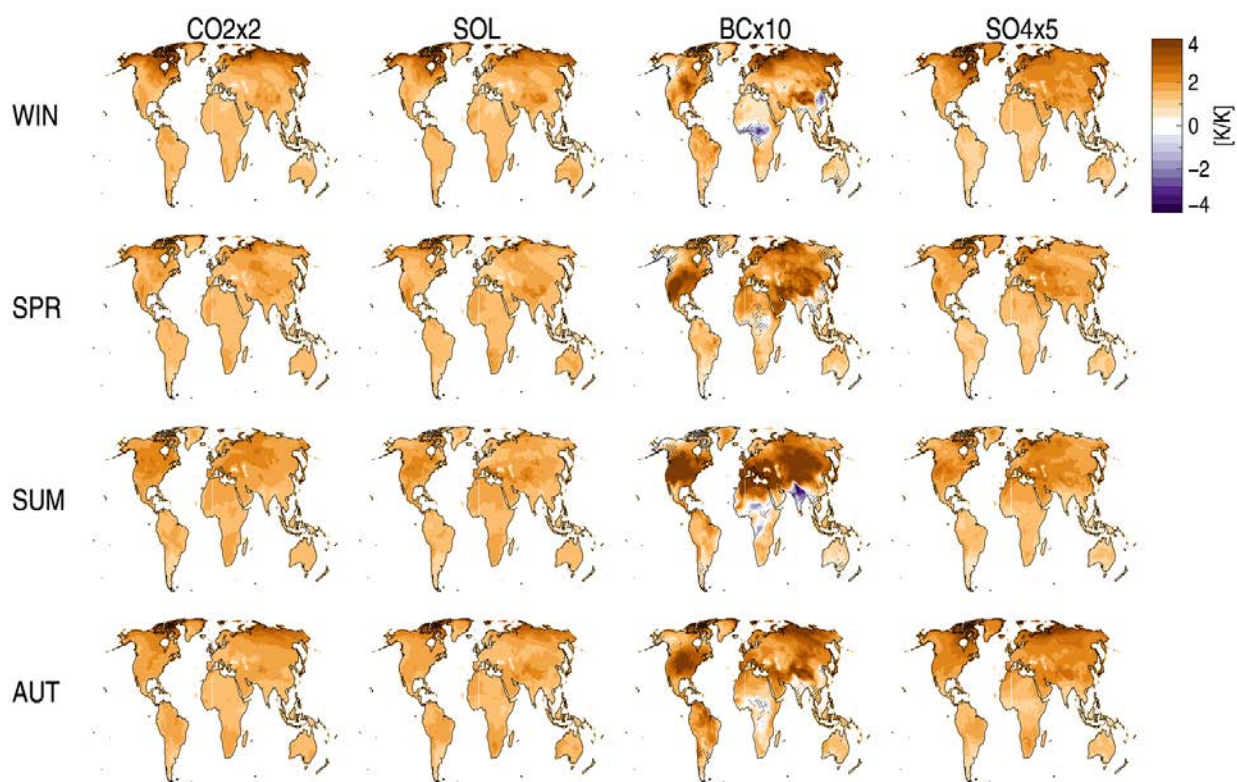

**Figure S5:** Multi-model median change in Tmax for the different seasons and drivers, normalized by the global mean temperature change for each model and driver.
